# Supplementary material for: Tracing the History of Hepatitis E Virus Infection in Mexico: From the Enigmatic Genotype 2 to the Current Disease Situation
Source: MDPI journal article supplement (doi:10.3390/v15091911), 2023-09-12
Supplement: s1 [file s1]

## Supplementary

**Supplementary Table S1. Sequences of the HEV genome reported in Latin America.**

| Country of origin   | Number of sequences | Genbank access | Genome region | Source  | Collection (year) | Length (bp) | Genotype | Reference |
|---------------------|---------------------|----------------|---------------|---------|-------------------|-------------|----------|-----------|
| Antigua and Barbuda | None                |                |               |         |                   |             |          |           |
| Argentina           | 41                  | KX812460       | ORF2          | Swine   | 2005              | 325         | --       | 93        |
|                     |                     | KX812461       | ORF2          | Swine   | 2005              | 324         | --       | 93        |
|                     |                     | KX812462       | ORF2          | Swine   | 2006              | 355         | 3        | 93        |
|                     |                     | KX812463       | ORF2          | River w | 2009              | 323         | --       | 93        |
|                     |                     | KX812464       | ORF2          | Dam w   | 2013              | 325         | --       | 93        |
|                     |                     | KX812465       | ORF2          | Human   | 2015              | 348         | --       | 93        |
|                     |                     | KX812466       | ORF2          | Human   | 2014              | 348         | --       | 93        |
|                     |                     | KX812467       | ORF2          | Human   | 2013              | 348         | --       | 93        |
|                     |                     | KX812468       | ORF2          | Human   | 2013              | 348         | --       | 93        |
|                     |                     | KX812469       | ORF2          | Human   | 2015              | 348         | --       | 93        |
|                     |                     | KY511413       | ORF2          | River w | 2013              | 345         | --       | 93        |
|                     |                     | AY258006       | ORF1          | Swine   | 2003 sb           | 287         | --       | 94        |
|                     |                     | AY286304       | ORF2          | Swine   | 2003 sb           | 148         | --       | 94        |
|                     |                     | KJ460358       | ORF1          | Human   | 2011              | 252         | 3a       | 95        |
|                     |                     | KJ460359       | ORF1          | Human   | 2013              | 237         | 3i       | 95        |
|                     |                     | KJ460360       | ORF1          | Human   | 2013              | 237         | 3a       | 95        |
|                     |                     | KJ460361       | ORF1          | Human   | 2013              | 237         | 3a       | 95        |
|                     |                     | KF751218       | ORF2          | Wast w  | 2010              | 323         | 3        | 96        |
|                     |                     | KF751219       | ORF2          | River   | 2010              | 323         | 3        | 96        |
|                     |                     | KF751220       | ORF2          | Wast w  | 2011              | 319         | 3        | 96        |
|                     |                     | KF751221       | ORF2          | Wast w  | 2007              | 321         | 3        | 96        |
|                     |                     | KF765479       | ORF1          | Wast w  | 2010              | 212         | 3        | 96        |
|                     |                     | AF264009       | ORF1          | --      | 2000 sb           | 371         | --       | 97        |
|                     |                     | AF264010       | ORF1          | --      | 2000 sb           | 371         | --       | 97        |
|                     |                     | AF264011       | ORF2          | --      | 2000 sb           | 98          | --       | 97        |
|                     |                     | AF264012       | ORF2          | --      | 2000 sb           | 148         | --       | 97        |
|                     |                     | JF490047       | ORF1          | Human   | 2009              | 379         | 3        | 98        |
|                     |                     | JF490048       | ORF1          | Human   | 2009              | 255         | 3        | 98        |
|                     |                     | JF490049       | ORF1          | Human   | 2010              | 295         | 3        | 98        |
|                     |                     | AY548058       | ORF2          | Human   | 2004 sb           | 98          | --       | 99        |
|                     |                     | AY924958       | ORF2          | Human   | 2005 sb           | 98          | --       | 99        |
|                     |                     | DQ469375       | ORF2          | Human   | 2006 sb           | 98          | --       | 99        |
|                     |                     | MK056268       | ORF2          | Swine   | 2018              | 302         | --       | 100       |
|                     |                     | MK056269       | ORF2          | Swine   | 2018              | 264         | --       | 100       |

|          |      |                                                                                                                                                                                                                                                                                                                                                    |                                                                                                                                                                                                          |                                                                                                                                                                                                                                   |                                                                                                                                                                                                                          |                                                                                                                                                                                                 |                                                                                                                                      |                                                                                                                                                                                  |
|----------|------|----------------------------------------------------------------------------------------------------------------------------------------------------------------------------------------------------------------------------------------------------------------------------------------------------------------------------------------------------|----------------------------------------------------------------------------------------------------------------------------------------------------------------------------------------------------------|-----------------------------------------------------------------------------------------------------------------------------------------------------------------------------------------------------------------------------------|--------------------------------------------------------------------------------------------------------------------------------------------------------------------------------------------------------------------------|-------------------------------------------------------------------------------------------------------------------------------------------------------------------------------------------------|--------------------------------------------------------------------------------------------------------------------------------------|----------------------------------------------------------------------------------------------------------------------------------------------------------------------------------|
|          |      | MK056270                                                                                                                                                                                                                                                                                                                                           | ORF2                                                                                                                                                                                                     | Swine                                                                                                                                                                                                                             | 2018                                                                                                                                                                                                                     | 287                                                                                                                                                                                             | --                                                                                                                                   | 100                                                                                                                                                                              |
|          |      | MK056271                                                                                                                                                                                                                                                                                                                                           | ORF2                                                                                                                                                                                                     | Swine                                                                                                                                                                                                                             | 2018                                                                                                                                                                                                                     | 272                                                                                                                                                                                             | --                                                                                                                                   | 100                                                                                                                                                                              |
|          |      | MK056272                                                                                                                                                                                                                                                                                                                                           | ORF2                                                                                                                                                                                                     | Swine                                                                                                                                                                                                                             | 2018                                                                                                                                                                                                                     | 272                                                                                                                                                                                             | --                                                                                                                                   | 100                                                                                                                                                                              |
|          |      | MK056273                                                                                                                                                                                                                                                                                                                                           | ORF2                                                                                                                                                                                                     | Swine                                                                                                                                                                                                                             | 2018                                                                                                                                                                                                                     | 302                                                                                                                                                                                             | --                                                                                                                                   | 100                                                                                                                                                                              |
|          |      | MK056274                                                                                                                                                                                                                                                                                                                                           | ORF2                                                                                                                                                                                                     | Swine                                                                                                                                                                                                                             | 2018                                                                                                                                                                                                                     | 264                                                                                                                                                                                             | --                                                                                                                                   | 100                                                                                                                                                                              |
|          |      | MK056275                                                                                                                                                                                                                                                                                                                                           | ORF2                                                                                                                                                                                                     | Swine                                                                                                                                                                                                                             | 2018                                                                                                                                                                                                                     | 267                                                                                                                                                                                             | --                                                                                                                                   | 100                                                                                                                                                                              |
|          |      | MK056276                                                                                                                                                                                                                                                                                                                                           | ORF2                                                                                                                                                                                                     | Swine                                                                                                                                                                                                                             | 2018                                                                                                                                                                                                                     | 278                                                                                                                                                                                             | --                                                                                                                                   | 100                                                                                                                                                                              |
|          |      | KY807297                                                                                                                                                                                                                                                                                                                                           | ORF2                                                                                                                                                                                                     | Water                                                                                                                                                                                                                             | 2015                                                                                                                                                                                                                     | 345                                                                                                                                                                                             | 3                                                                                                                                    | 101                                                                                                                                                                              |
| Bahamas  | None |                                                                                                                                                                                                                                                                                                                                                    |                                                                                                                                                                                                          |                                                                                                                                                                                                                                   |                                                                                                                                                                                                                          |                                                                                                                                                                                                 |                                                                                                                                      |                                                                                                                                                                                  |
| Barbados | None |                                                                                                                                                                                                                                                                                                                                                    |                                                                                                                                                                                                          |                                                                                                                                                                                                                                   |                                                                                                                                                                                                                          |                                                                                                                                                                                                 |                                                                                                                                      |                                                                                                                                                                                  |
| Belize   | None |                                                                                                                                                                                                                                                                                                                                                    |                                                                                                                                                                                                          |                                                                                                                                                                                                                                   |                                                                                                                                                                                                                          |                                                                                                                                                                                                 |                                                                                                                                      |                                                                                                                                                                                  |
| Bermuda  | None |                                                                                                                                                                                                                                                                                                                                                    |                                                                                                                                                                                                          |                                                                                                                                                                                                                                   |                                                                                                                                                                                                                          |                                                                                                                                                                                                 |                                                                                                                                      |                                                                                                                                                                                  |
| Bolivia  | 13   | JQ424437<br>to<br>JQ424443<br>JQ424444<br>to<br>JQ424449                                                                                                                                                                                                                                                                                           | ORF2<br><br>ORF2                                                                                                                                                                                         | Swine<br><br>Human                                                                                                                                                                                                                | 2006<br><br>2006                                                                                                                                                                                                         | 348<br><br>348                                                                                                                                                                                  | 3i<br><br>3e                                                                                                                         | 102<br>and<br>103                                                                                                                                                                |
| Brazil   | 154  | MF981263<br>MF981264<br>MF981265<br>MF981266<br>MF981267<br>MF981268<br>MF981269<br>MF981270<br>MF981271<br>MF981272<br>MG573667<br>MZ061632<br>MZ061633<br>MZ061634<br>MZ061635<br>MZ061636<br>MZ061637<br>OP485092<br>OQ446059<br>MH664123<br>MH664124<br>KX757780<br>KX757781<br>KX770298<br>KY765017<br>to<br>KY765021<br>MF438128<br>MF438129 | ORF1<br>ORF1<br>ORF1<br>ORF1<br>ORF1<br>ORF1<br>ORF1<br>ORF2<br>ORF2<br>ORF2<br>ORF2<br>ORF1<br>ORF1<br>ORF1<br>ORF1<br>ORF1<br>ORF1<br>ORF1<br>ORF1<br>ORF2<br>Complete<br>ORF1<br>ORF2<br>ORF1<br>ORF2 | Swine<br>Swine<br>Swine<br>Swine<br>Swine<br>Swine<br>Swine<br>Swine<br>Swine<br>Swine<br>Monkey<br>Human<br>Human<br>Human<br>Human<br>Human<br>Human<br>Capybara<br>Human<br>Swine<br>Swine<br>Human<br>Human<br>Human<br>Swine | 2009<br>2009<br>2009<br>2008<br>2009<br>2009<br>2009<br>2009<br>2009<br>2009<br>2017<br>2016<br>2017<br>2017<br>2017<br>2018<br>2018<br>2019<br>2006<br>2017<br>2017<br>2015<br>2015<br>2015<br>2015<br><br>2014<br>2014 | 186<br>186<br>186<br>186<br>186<br>186<br>186<br>257<br>257<br>257<br>302<br>255<br>255<br>255<br>255<br>255<br>255<br>442<br>1036<br>304<br>7233<br>242<br>304<br>217<br>303<br><br>207<br>207 | 3<br>3<br>3<br>3<br>3<br>3<br>3<br>3<br>3<br>3<br>3<br>3<br>3<br>3<br>3<br>3<br>3<br>3<br>3<br>3<br>3<br>3<br>3<br>3<br><br>3c<br>3c | --<br>--<br>--<br>--<br>--<br>--<br>--<br>--<br>--<br>--<br>104<br>105<br>105<br>105<br>105<br>105<br>105<br>106<br>107<br>108<br>108<br>--<br>--<br>--<br>109<br><br>110<br>110 |

|  |  |                            |      |        |        |     |    |     |
|--|--|----------------------------|------|--------|--------|-----|----|-----|
|  |  | MF438130<br>to<br>MF438133 | ORF1 | Swine  | 2014   | 207 | 3h | 110 |
|  |  | MF438134                   | ORF2 | Swine  | 2014   | 304 | 3c | 110 |
|  |  | MF438135                   | ORF2 | Swine  | 2014   | 304 | 3b | 110 |
|  |  | JN983192                   | ORF2 | Swine  | 2010   | 323 | 3  | 111 |
|  |  | JN983193                   | ORF2 | Swine  | 2010   | 338 | 3c | 111 |
|  |  | JN983194                   | ORF2 | Swine  | 2010   | 336 | 3f | 111 |
|  |  | JN983195                   | ORF2 | Swine  | 2010   | 336 | 3f | 111 |
|  |  | JN983196                   | ORF2 | Swine  | 2010   | 249 | 3f | 111 |
|  |  | JN983197                   | ORF2 | Swine  | 2010   | 336 | 3f | 111 |
|  |  | JN983198                   | ORF2 | Swine  | 2010   | 345 | 3c | 111 |
|  |  | JN983199<br>to<br>JN983206 | ORF1 | Swine  | 2010   | 266 | 3c | 111 |
|  |  | JN983207                   | ORF1 | Swine  | 2010   | 249 | 3c | 111 |
|  |  | JN983208                   | ORF1 | Swine  | 2010   | 266 | 3c | 111 |
|  |  | JN983209                   | ORF1 | Swine  | 2010   | 266 | 3c | 111 |
|  |  | JN983210                   | ORF1 | Swine  | 2010   | 266 | 3f | 111 |
|  |  | JN983211                   | ORF1 | Swine  | 2010   | 266 | 3c | 111 |
|  |  | JN983212                   | ORF1 | Swine  | 2010   | 266 | 3c | 111 |
|  |  | KU888659<br>to<br>KU888663 | ORF1 | Swine  | 2015   | 230 | 3  | 112 |
|  |  | KU888664                   | ORF1 | Swine  | 2011   | 288 | 3  | --  |
|  |  | KU888665                   | ORF1 | Swine  | 2011   | 288 | 3  | --  |
|  |  | KX578263                   | ORF1 | Swine  | 2013   | 245 | 3  | 112 |
|  |  | KX578264                   | ORF1 | Monkey | 2015   | 242 | 3  | 113 |
|  |  | KX578265                   | ORF1 | Monkey | 2015   | 242 | 3  | 113 |
|  |  | KX578266                   | ORF1 | Monkey | 2015   | 242 | 3  | 113 |
|  |  | KX578267                   | ORF2 | Swine  | 2013   | 304 | 3  | 112 |
|  |  | KX578268                   | ORF2 | Monkey | 2015   | 304 | 3  | 113 |
|  |  | KX578269                   | ORF2 | Monkey | 2015   | 304 | 3  | 113 |
|  |  | KX578270                   | ORF2 | Monkey | 2015   | 304 | 3  | 113 |
|  |  | KY907039<br>to<br>KY907051 | ORF1 | Swine  | 2012   | 266 | 3  | 114 |
|  |  | KY907052<br>to<br>KY907064 | ORF2 | Swine  | 2012   | 423 | 3  | 114 |
|  |  | JX123025                   | ORF2 | Swine  | 2010   | 304 | 3  | 115 |
|  |  | JX123026                   | ORF2 | Swine  | 2010   | 304 | 3  | 115 |
|  |  | JX173928                   | ORF2 | Human  | 2012sb | 304 | 3  | 116 |
|  |  | JX173929                   | ORF2 | Human  | 2012sb | 304 | 3  | 116 |
|  |  | JX173930                   | ORF2 | Human  | 2012sb | 304 | 3  | 116 |
|  |  | KF719311                   | ORF2 | Swine  | 2012   | 342 | 3  | --  |
|  |  | KF719312                   | ORF2 | Swine  | 2012   | 336 | 3  | --  |
|  |  | KF719313                   | ORF2 | Swine  | 2012   | 336 | 3  | --  |

|            |      |                |      |       |         |      |    |     |
|------------|------|----------------|------|-------|---------|------|----|-----|
|            |      | KF719314       | ORF2 | Swine | 2012    | 336  | 3  | --  |
|            |      | KF719315       | ORF2 | Swine | 2012    | 336  | 3  | --  |
|            |      | KF719316       | ORF2 | Swine | 2012    | 306  | 3  | --  |
|            |      | KC549910       | ORF2 | Swine | 2011    | 304  | 3  | 117 |
|            |      | to<br>KC549917 |      |       |         |      |    |     |
|            |      | KF152884       | ORF2 | Human | 2011    | 304  | 3b | 118 |
|            |      | KM502569       | ORF2 | Human | 2009    | 3004 | 3b | 118 |
|            |      | KP966825       | ORF2 | Swine | 2014    | 304  | 3b | 119 |
|            |      | KP966826       | ORF2 | Swine | 2014    | 304  | 3b | 119 |
|            |      | KP966827       | ORF2 | Swine | 2014    | 304  | 3b | 119 |
|            |      | KP966828       | ORF1 | Swine | 2014    | 204  | 3b | 119 |
|            |      | KP966829       | ORF1 | Swine | 2014    | 242  | 3b | 119 |
|            |      | EF491206       | ORF2 | Swine | 2003    | 1762 | 3  | --  |
|            |      | GQ421465       | ORF1 | Human | 2009 sb | 242  | 3  | 120 |
|            |      | HM154537       | ORF1 | Swine | 2009    | 240  | 3  | 121 |
|            |      | HM154538       | ORF1 | Swine | 2008    | 240  | 3  | 121 |
|            |      | HM154539       | ORF1 | Swine | 2008    | 340  | 3  | 121 |
|            |      | to<br>HM154542 |      |       |         |      |    |     |
|            |      | HM154543       | ORF2 | Swine | 2008    | 141  | 3  | 121 |
|            |      | to<br>HM154547 |      |       |         |      |    |     |
|            |      | JN166093       | ORF1 | Swine | 2010    | 243  | 3  | 115 |
|            |      | JN166094       | ORF1 | Swine | 2010    | 242  | 3  | 115 |
|            |      | JN190065       | ORF2 | Swine | 2009    | 304  | 3  | 122 |
|            |      | to<br>JN190070 |      |       |         |      |    |     |
|            |      | JN190071       | ORF2 | Swine | 2009    | 242  | 3  | 122 |
|            |      | JN190072       | ORF2 | Swine | 2009    | 242  | 3  | 122 |
|            |      | EF591852       | ORF1 | Swine | 2007 sb | 237  | 3  | 123 |
|            |      | EF591853       | ORF1 | Swine | 2007 sb | 237  | 3  | 123 |
|            |      | EF591854       | ORF2 | Swine | 2007 sb | 303  | 3  | 123 |
|            |      | EF591855       | ORF2 | Swine | 2007 sb | 303  | 3  | 123 |
|            |      | EF591856       | ORF2 | Swine | 2007 sb | 303  | 3  | 123 |
| Chile      | None |                |      |       |         |      |    |     |
| Colombia   | 74   | KU639880       | ORF2 | Swine | 2012    | 815  | 3  | 124 |
|            |      | to<br>KU639890 |      |       |         |      |    |     |
|            |      | KU639891       | ORF2 | Swine | 2012    | 298  | 3  | 124 |
|            |      | to<br>KU639953 |      |       |         |      |    |     |
| Costa Rica | 12   | DQ677372       | ORF2 | Swine | 2006 sb | 212  | 3  | 125 |
|            |      | to<br>DQ677377 |      |       |         |      |    |     |
|            |      | DQ677378       | ORF2 | Swine | 2006sb  | 179  | 3  | 125 |
|            |      | DQ677379       | ORF2 | Swine | 2006 sb | 212  | 3  | 125 |
|            |      | DQ677380       | ORF2 | Swine | 2006 sb | 212  | 3  | 125 |

|                           |      |          |      |         |         |     |    |     |
|---------------------------|------|----------|------|---------|---------|-----|----|-----|
|                           |      | DQ677381 | ORF2 | Swine   | 2006 sb | 209 | 3  | 125 |
|                           |      | DQ677382 | ORF2 | Swine   | 2006 sb | 212 | 3  | 125 |
|                           |      | DQ677383 | ORF2 | Swine   | 2006 sb | 212 | 3  | 125 |
| Cuba                      | 55   | EU284748 | ORF2 | Human   | 2007 sb | 354 | 1  | 126 |
|                           |      | EU284749 | ORF2 | Human   | 2007 sb | 354 | 1  | 126 |
|                           |      | EF493155 | ORF1 | Human   | 2007 sb | 307 | 1  | 126 |
|                           |      | EU165494 | ORF1 | Human   | 2007 sb | 241 | 1  | 126 |
|                           |      | to       |      |         |         |     |    |     |
|                           |      | EU165504 |      |         |         |     |    |     |
|                           |      | JF937673 | ORF1 | Swine   | 2007    | 201 | 3  | --  |
|                           |      | to       |      |         |         |     |    |     |
|                           |      | JF937678 |      |         |         |     |    |     |
|                           |      | HQ446873 | ORF1 | Human   | 2008    | 279 | 3  | --  |
|                           |      | to       |      |         |         |     |    |     |
|                           |      | HQ446878 |      |         |         |     |    |     |
|                           |      | FJ769237 | ORF1 | Human   | 2007    | 270 | 3  | 127 |
|                           |      | FJ769238 | ORF1 | Human   | 2007    | 260 | 3  | 127 |
|                           |      | HQ446879 | ORF2 | Human   | 2008    | 149 | 3  | --  |
|                           |      | LM654183 | ORF2 | Dolphin | 2014    | 167 | 3  | 128 |
|                           |      | LM654184 | ORF2 | Dolphin | 2014    | 167 | 3  | 128 |
|                           |      | KP096349 | ORF1 | Dolphin | 2014    | 289 | 3  | 128 |
|                           |      | KM065571 | ORF1 | Dolphin | 2007    | 298 | 3b | 128 |
|                           |      | KM102180 | ORF2 | Dolphin | 2007    | 322 | 3  | 128 |
|                           |      | FJ948818 | ORF1 | Human   | 2007    | 240 | 3  | --  |
|                           |      | FJ948819 | ORF1 | Human   | 2007    | 246 | 3  | --  |
|                           |      | LN849722 | ORF2 | Human   | 2013    | 125 | 3  | --  |
|                           |      | LN849723 | ORF2 | Human   | 2013    | 125 | 3  | --  |
|                           |      | OM867876 | ORF2 | Swine   | 2016    | 336 | 3  | 129 |
|                           |      | OM867877 | ORF2 | Swine   | 2016    | 336 | 3  | 129 |
|                           |      | OM867878 | ORF2 | Swine   | 2007    | 291 | 3  | 129 |
|                           |      | OM867879 | ORF2 | Swine   | 2007    | 336 | 3  | 129 |
|                           |      | to       |      |         |         |     |    |     |
|                           |      | OM867885 |      |         |         |     |    |     |
|                           |      | OM867886 | ORF2 | Swine   | 2016    | 336 | 3  | 129 |
|                           |      | OM867887 | ORF2 | Swine   | 2016    |     | 3  | 129 |
| Dominica<br>n<br>Republic | None |          |      |         |         |     |    |     |
| Ecuador                   | None |          |      |         |         |     |    |     |
| El<br>Salvador            | None |          |      |         |         |     |    |     |
| Grenada                   | None |          |      |         |         |     |    |     |
| Guatemala                 | None |          |      |         |         |     |    |     |
| Guyana                    | None |          |      |         |         |     |    |     |
| Haiti                     | 3    | AF047864 | ORF2 | Human   | 1998 sb | 448 | -- | 130 |
|                           |      | AF047865 | ORF1 | Human   | 1998 sb | 233 | -- | 130 |

[illegible]

|                    |      |          |          |         |         |      |    |     |
|--------------------|------|----------|----------|---------|---------|------|----|-----|
| Trinity and Tobago | None |          |          |         |         |      |    |     |
| Uruguay            | 54   | MG182432 | ORF2     | Swine   | 2017 sb | 272  | -- | --  |
|                    |      | MG182433 | ORF2     | Swine   | 2017 sb | 272  | -- | --  |
|                    |      | MG182434 | ORF2     | Swine   | 2017 sb | 298  | -- | --  |
|                    |      | MW59686  | Complete | Human   | 2018    | 7229 | 3  | --  |
|                    |      | MT774175 | ORF1     | Human   | 2017    | 1446 | 3  | --  |
|                    |      | MF590059 | ORF1     | Swine   | 2015    | 215  | 3  | 132 |
|                    |      | MF590060 | ORF1     | Swine   | 2015    | 215  | 3  | 132 |
|                    |      | MF590061 | ORF1     | Swine   | 2015    | 215  | 3  | 132 |
|                    |      | MG182431 | ORF1     | Human   | 2016    | 214  | 3  | --  |
|                    |      | MG432489 | ORF1     | Human   | 2017 sb | 159  | 3  | --  |
|                    |      | MG432490 | ORF1     | Human   | 2017 sb | 159  | 3  | --  |
|                    |      | MT430885 | ORF1     | Human   | 2017    | 210  | 3  | 133 |
|                    |      | MT430886 | ORF1     | Human   | 2017    | 214  | 3  | 133 |
|                    |      | MT497901 | ORF2     | Peccary | 2018    | 326  | 3  | 134 |
|                    |      | MT497902 | ORF2     | Human   | 2018    | 354  | 3  | 135 |
|                    |      | MT497903 | ORF2     | Human   | 2017    | 330  | 3  | 135 |
|                    |      | KF679999 | ORF1     | Human   | 2010    | 282  | 3  | 136 |
|                    |      | KF680000 | ORF1     | Human   | 2010    | 282  | 3  | 136 |
|                    |      | KF680001 | ORF1     | Human   | 2013    | 214  | 3  | 136 |
|                    |      | JX880196 | ORF2     | Human   | 2012 sb | 768  | 3  | 137 |
|                    |      | to       |          |         |         |      |    |     |
|                    |      | JX880203 |          |         |         |      |    |     |
|                    |      | JX880204 | ORF1     | Human   | 2010 sb | 480  | 3  | 137 |
|                    |      | JX880205 | ORF1     | Human   | 2012 sb | 481  | 3  | 137 |
|                    |      | JX880206 | ORF1     | Human   | 2012 sb | 477  | 3  | 137 |
|                    |      | JX880207 | ORF1     | Human   | 2012 sb | 481  | 3  | 137 |
|                    |      | JX880208 | ORF1     | Human   | 2012 sb | 482  | 3  | 137 |
|                    |      | JX880209 | ORF1     | Human   | 2012 sb | 482  | 3  | 137 |
|                    |      | JX880210 | ORF1     | Human   | 2012 sb | 482  | 3  | 137 |
|                    |      | JX880211 | ORF1     | Human   | 2012 sb | 210  | 3  | 137 |
|                    |      | to       |          |         |         |      |    |     |
|                    |      | JX880216 |          |         |         |      |    |     |
|                    |      | JX880217 | ORF1     | Human   | 2012 sb | 209  | 3  | 137 |
|                    |      | JX880218 | ORF1     | Human   | 2012 sb | 210  | 3  | 137 |
|                    |      | JX880219 | ORF1     | Human   | 2012 sb | 207  | 3  | 137 |
|                    |      | JX880220 | ORF1     | Human   | 2012 sb | 210  | 3  | 137 |
|                    |      | KC189822 | ORF2     | Human   | 2012 sb | 844  | 3  | 137 |
|                    |      | HM775425 | ORF2     | Human   | 2010 sb | 76   | 3  | 138 |
|                    |      | HM775426 | ORF2     | Human   | 2010 sb | 76   | 3  | 138 |
|                    |      | HM765427 | ORF2     | Human   | 2010 sb | 76   | 3  | 138 |
|                    |      | HM765428 | ORF2     | Human   | 2010 sb | 75   | 3  | 138 |
|                    |      | HM765429 | ORF2     | Human   | 2010 sb | 76   | 3  | 138 |
|                    |      | HQ724532 | ORF3     | Human   | 2010 sb | 75   | 3  | 138 |
| Venezuela          | 3    | HM366940 | ORF1     | Human   | 2008    | 329  | 3  | 139 |
| a                  |      | HM366941 | ORF1     | Human   | 2008    | 329  | 1  | 139 |

|  |  |          |      |       |      |     |   |     |
|--|--|----------|------|-------|------|-----|---|-----|
|  |  | HM366942 | ORF1 | Human | 2008 | 331 | 1 | 139 |
|--|--|----------|------|-------|------|-----|---|-----|

Sb= Submission year
